# Supplementary material for: One-step synthesis of water-dispersible ultra-small Fe3O4 nanoparticles as contrast agents for T1 and T2 magnetic resonance imaging
Source: Royal Society of Chemistry journal article supplement (doi:10.1039/c3nr05550g), 2013-12-03
Supplement: c3nr05550g.pdf [file c3nr05550g.pdf]

## Supporting Information

# One-Step Synthesis of Water-dispersible Ultra-Small Fe<sub>3</sub>O<sub>4</sub> Nanoparticles as Contrast Agents for T<sub>1</sub> and T<sub>2</sub> Magnetic Resonance Imaging

Guannan Wang,<sup>ac</sup> Xuanjun Zhang,<sup>c</sup> Yaxu Liu,<sup>ab</sup> Andreas Skallberg,<sup>c</sup> Zhangjun Hu,<sup>c</sup> Xifan Mei<sup>\*b</sup> and Kajsa Uvdal<sup>\*c</sup>

<sup>a</sup> Department of Chemistry, College of Pharmacy, Liaoning Medical University, Jinzhou, 121001, China

<sup>b</sup> The Key Laboratory for Medical Tissue Engineering of Liaoning Province, Liaoning Medical University, Jinzhou, 121001, China. E-mail: meixifan1971@163.com; Fax: +86-416-4673162; Tel: +86-416-4673162

<sup>c</sup> Division of Molecular Surface Physics & Nanoscience, Department of Physics, Chemistry, and Biology, Linköping University, Linköping 58183, Sweden. E-mail: kajsa@ifm.liu.se; Fax: +46 13 28 8969; Tel: +46 13281208

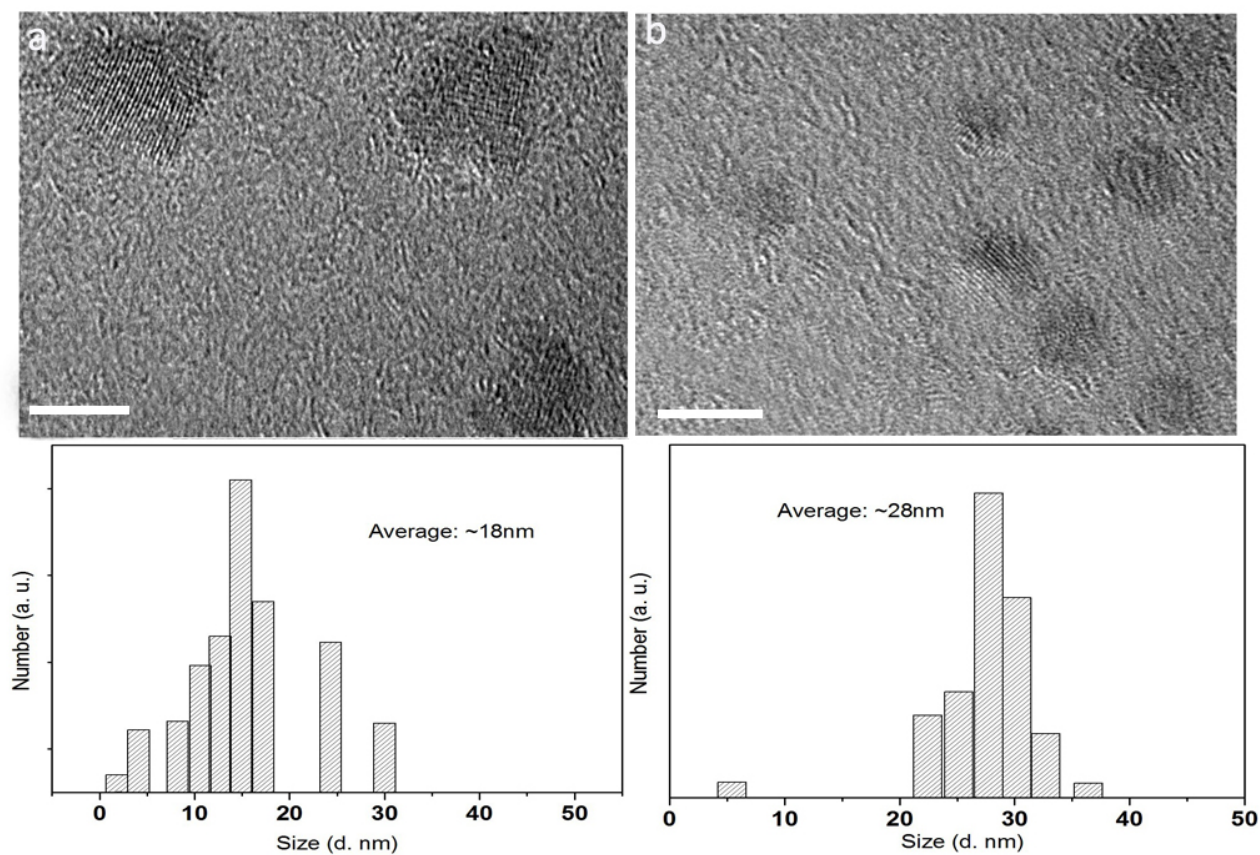

Figure S1. The size of  $\text{Fe}_3\text{O}_4$  nanoparticles can be impacted by changing the amount of PAA. The TEM images as-synthesized  $\text{Fe}_3\text{O}_4$  nanoparticles by changing the amount of PAA: a) 1mmol, b) 10mmol. The histograms below a and b are their DLS spectrum. Scale bar represents 5nm.

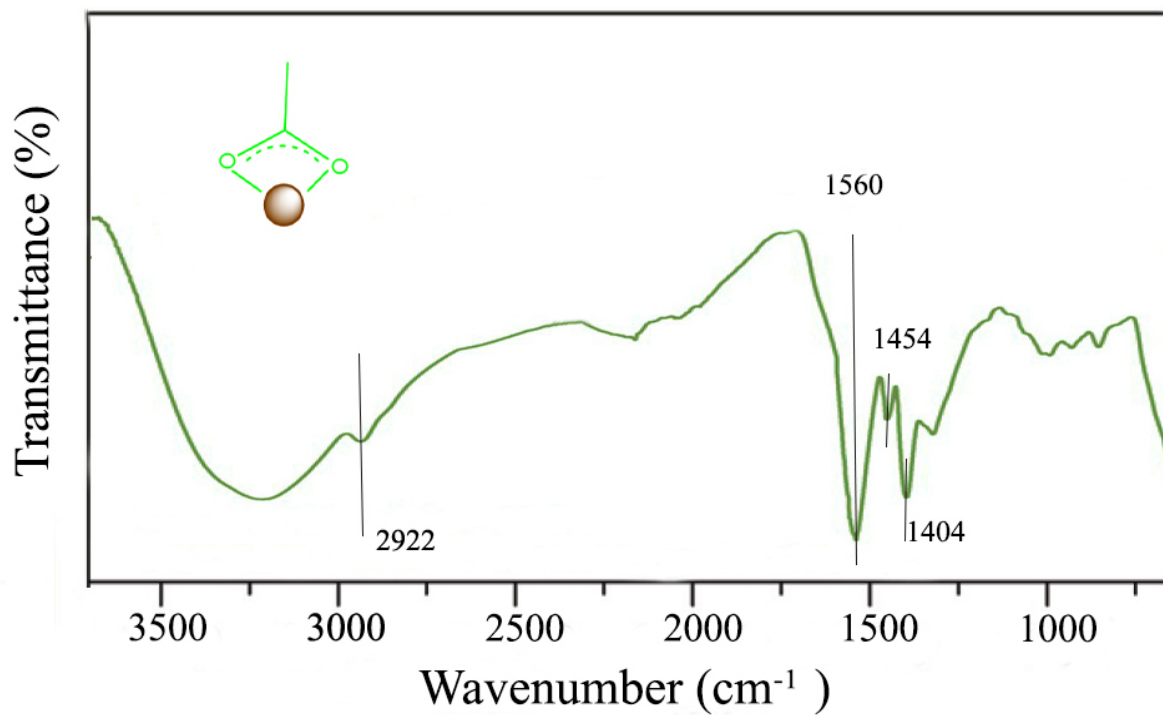

Figure S2. The FTIR spectra of 2.2 nm sized Fe<sub>3</sub>O<sub>4</sub> nanoparticles, the insert is the schematic showing the carboxylate group bound to surface of nanoparticles in a bridging coordination.

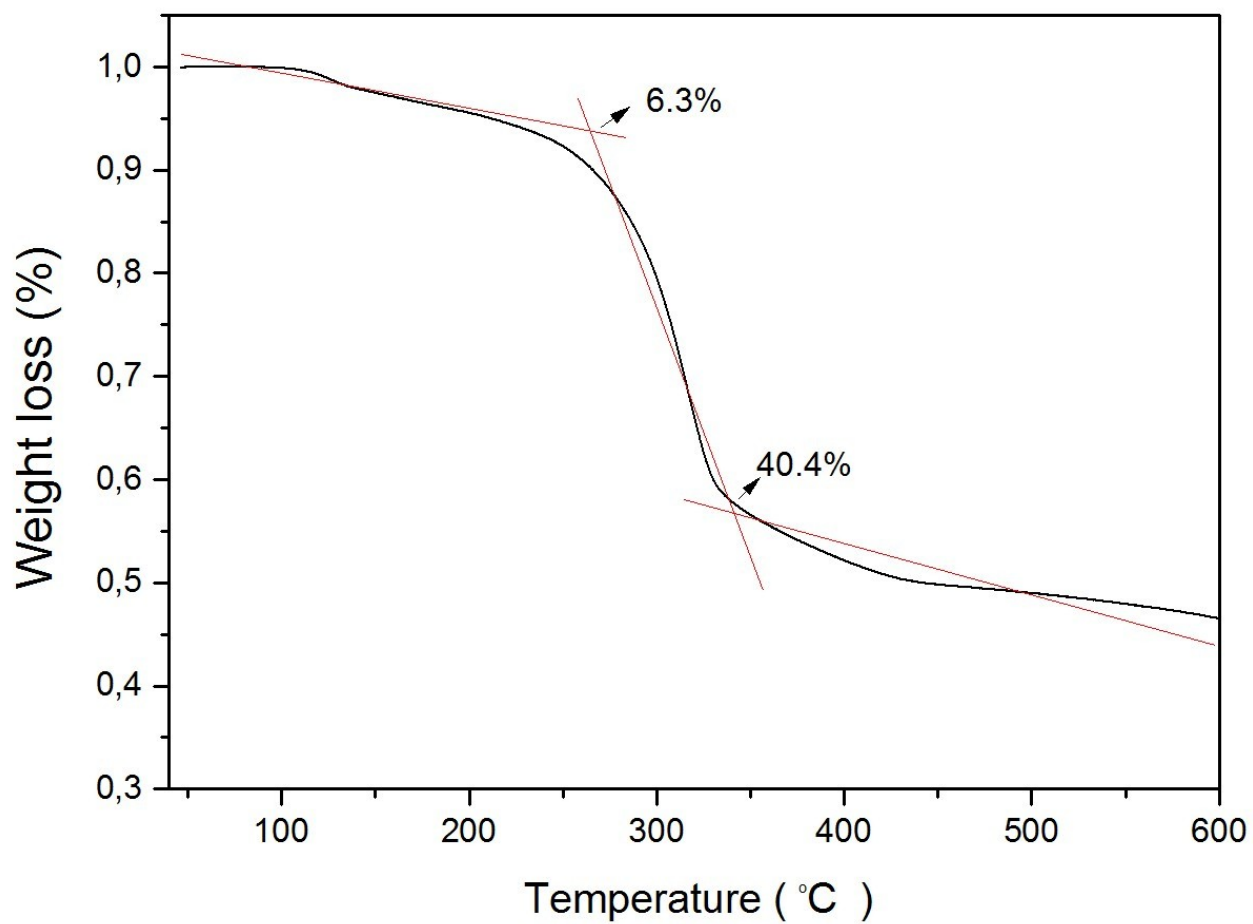

Figure S3. TGA curves of 2.2 nm sized Fe<sub>3</sub>O<sub>4</sub> nanoparticles.
